# Supplementary material for: Exfoliated and reorganized graphite oxide on titania nanoparticles as an auxiliary co-catalyst for photocatalytic solar conversion
Source: Royal Society of Chemistry journal article supplement (doi:10.1039/c1cp20697d), 2011-01-01
Supplement: c1cp20697d.pdf [file c1cp20697d.pdf]

*Electronic Supplementary Information (ESI)*

**Exfoliated and Reorganized Graphite Oxide on Titania Nanoparticles as an Auxiliary Co-catalyst for Photocatalytic Solar Conversion**

Yiseul Park, Seung-Hee Kang, Wonyong Choi\*

School of Environmental Science and Engineering, Pohang University of Science and Technology (POSTECH), Pohang 790-784, Korea

\*E-mail: [wchoi@postech.edu](mailto:wchoi@postech.edu)

**1. FT-IR analysis**

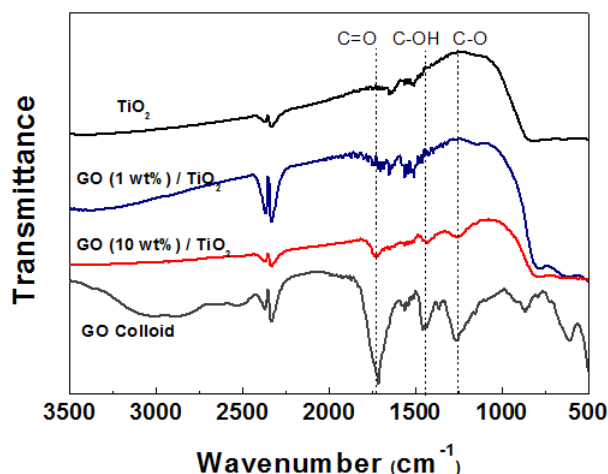

**Figure S1.** FT-IR spectra of TiO<sub>2</sub>, GO colloid, GO (1 wt %)/TiO<sub>2</sub> and GO (10 wt %)/TiO<sub>2</sub>

To determine functional groups existed in GO/TiO<sub>2</sub>, FT-IR spectroscopy was performed. Figure S1 shows FT-IR spectra of TiO<sub>2</sub>, GO, GO (1 wt %)/TiO<sub>2</sub> and GO (10 wt %)/TiO<sub>2</sub>. In curve of GO, the absorption peak due to C=O stretching of COOH groups of GO was observed at about 1726 cm<sup>-1</sup> and the absorption at 1470 cm<sup>-1</sup> and 1280 cm<sup>-1</sup> were attributed to the tertiary C-OH and C-O stretching mode, respectively. These peaks were also observed in curve of GO (1 wt %)/TiO<sub>2</sub> and GO (10 wt %)/TiO<sub>2</sub> as well.<sup>1</sup>

## 2. $\zeta$ -potential analysis

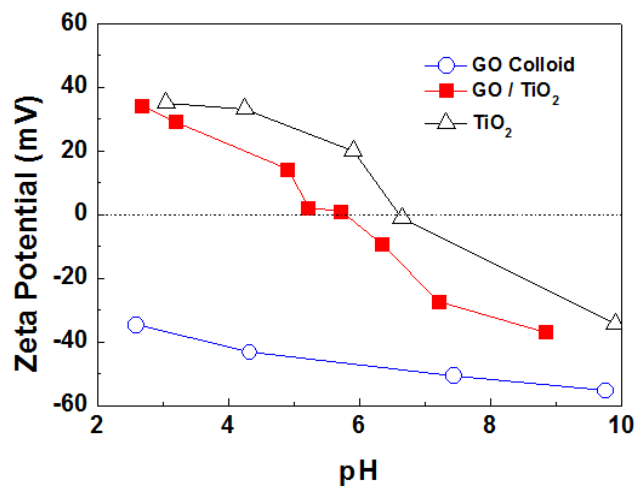

**Figure S2.** pH-dependent  $\zeta$ -potential of GO/TiO<sub>2</sub>, GO, TiO<sub>2</sub> suspensions in the presence of NaNO<sub>3</sub> (0.1 mM)

## References

- (1) H. Zhang, X. Lv, Y. Li, Y. Wang, J. Li, *ACS Nano*, 2010, **4**, 380.
